# Supplementary material for: Expanding applications of zeolite imidazolate frameworks in catalysis: synthesis of quinazolines using ZIF-67 as an efficient heterogeneous catalyst
Source: Royal Society of Chemistry journal article supplement (doi:10.1039/c4ra16168h), 2015-01-01
Supplement: c4ra16168h1.pdf [file c4ra16168h1.pdf]

# SUPPORTING INFORMATION

**Expanding applications of zeolite imidazolate frameworks in catalysis: Synthesis of  
quinazolines using ZIF-67 as an efficient heterogeneous catalyst**

Thanh Truong\*, Tam M. Hoang, Chung K. Nguyen, Quynh T. N. Huynh, Nam T. S. Phan\*

Department of Chemical Engineering, HCMC University of Technology, VNU-HCM,

268 Ly Thuong Kiet, District 10, Ho Chi Minh City, Viet Nam

\*Email: [tvthanh@hcmut.edu.vn](mailto:tvthanh@hcmut.edu.vn)

[ptsnam@hcmut.edu.vn](mailto:ptsnam@hcmut.edu.vn)

Ph: (+84 8) 38647256 ext. 5681

Fx: (+84 8) 38637504

## 1 Materials and instrumentation

All reagents and starting materials were obtained commercially from Sigma-Aldrich and Acros, and were used as received without any further purification unless otherwise noted. Nitrogen physisorption measurements were conducted using a Micromeritics 2020 volumetric adsorption analyzer system. Samples were pretreated by heating under vacuum at 200 °C for 6 h. A Netzsch Thermoanalyzer STA 409 was used for thermogravimetric analysis (TGA) with a heating rate of 5 °C/min under a nitrogen atmosphere. X-ray powder diffraction (XRD) patterns were recorded using a Cu K $\alpha$  radiation source on a D8 Advance Bruker powder diffractometer. Scanning electron microscopy studies were conducted on a S4800 Scanning Electron Microscope (SEM). Transmission electron microscopy studies were performed using a JEOL JEM 1400 Transmission Electron Microscope (TEM) at 80 kV. The ZIF-67 sample was dispersed on holey carbon grids for TEM observation. Elemental analysis with Inductively Coupled Plasma Atomic Emission Spectroscopy (ICP-MS) was performed on a Shimadzu ICPE-9000. Fourier transform infrared (FT-IR) spectra were obtained on a Nicolet 6700 instrument, with samples being dispersed on potassium bromide pellets.

Gas chromatographic (GC) analyses were performed using a Shimadzu GC 2010-Plus equipped with a flame ionization detector (FID) and an SPD-5 column (length = 30 m, inner diameter = 0.25 mm, and film thickness = 0.25  $\mu$ m). The temperature program for GC analysis heated samples from 100 to 130 °C at 40 °C/min; heated from 130 to 180 °C at 50 °C/min; heated them from 180 to 280 °C at 50 °C/min and held them at 280 °C for 3.5 min. Inlet and detector temperature were set constant at 280 °C. Diphenyl ether was used as

internal standard to calculate the conversion of reaction. The  $^1\text{H}$  and  $^{13}\text{C}$  NMR were recorded on a Bruker AV 500 MHz with tetramethylsilane as standard.

## 2 Synthesis of Co-MOFs and Co-ZIFs

### ZIF-67

The ZIF-67 was prepared according to literature procedure [1]. In a typical preparation, a mixture of 2-methylimidazole (3.284 g, 40 mmol) and triethylamine (5.6 ml, 40 mmol) was dissolved in water (10 mL). A solution of  $\text{Co}(\text{NO}_3)_2 \cdot 6\text{H}_2\text{O}$  (0.73 g, 2.5 mmol) in water (10 mL) was then added, and the resulting solution was stirred for 10 min at room temperature. The purple precipitates were separated by centrifugation, washed with water (3 x 10 mL) and methanol (3 x 10 mL) at room temperature. The material was evacuated under vacuum at 150 °C for 6 h, yielding 0.314 g of ZIF-67 in the form of purple crystals (56% yield).

Elemental analysis of ZIF-67 with ICP-MS indicated a cobalt loading of 4.32 mmol/g, is close to theoretical value of 4.48 mmol/g.

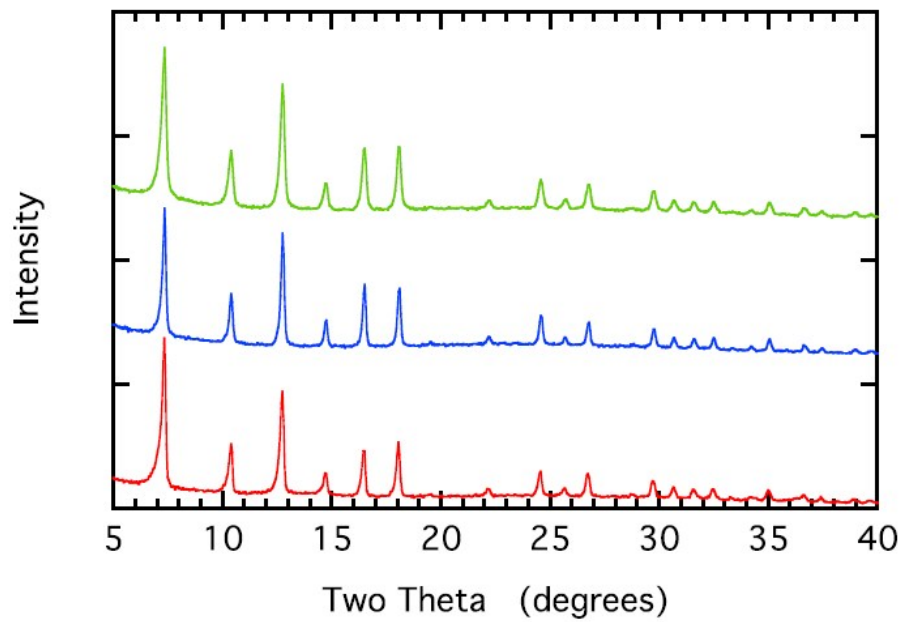

Fig. S1. X-ray powder diffractograms of ZIF-67 in the previous study [1].

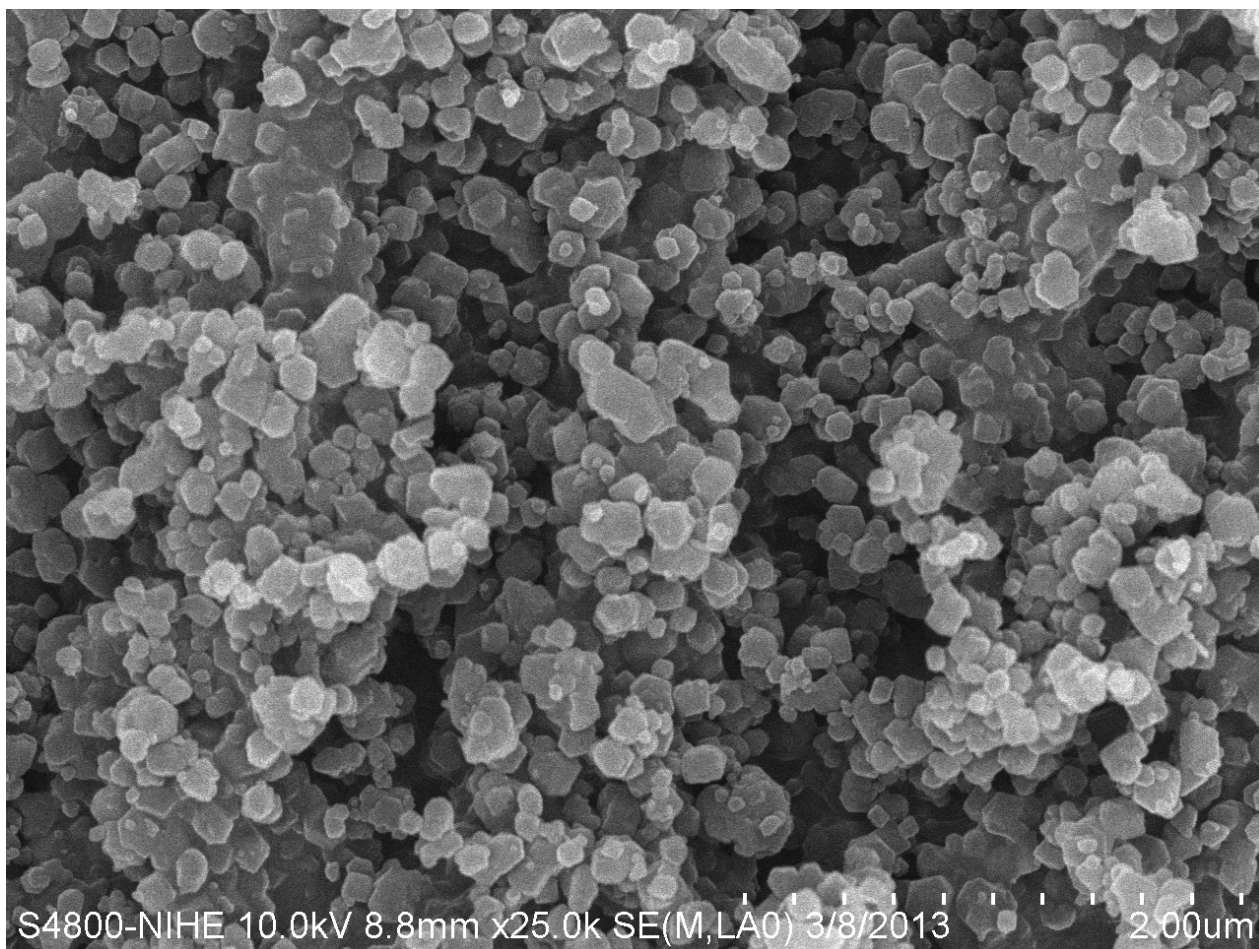

Fig. S2. SEM micrograph of the ZIF-67.

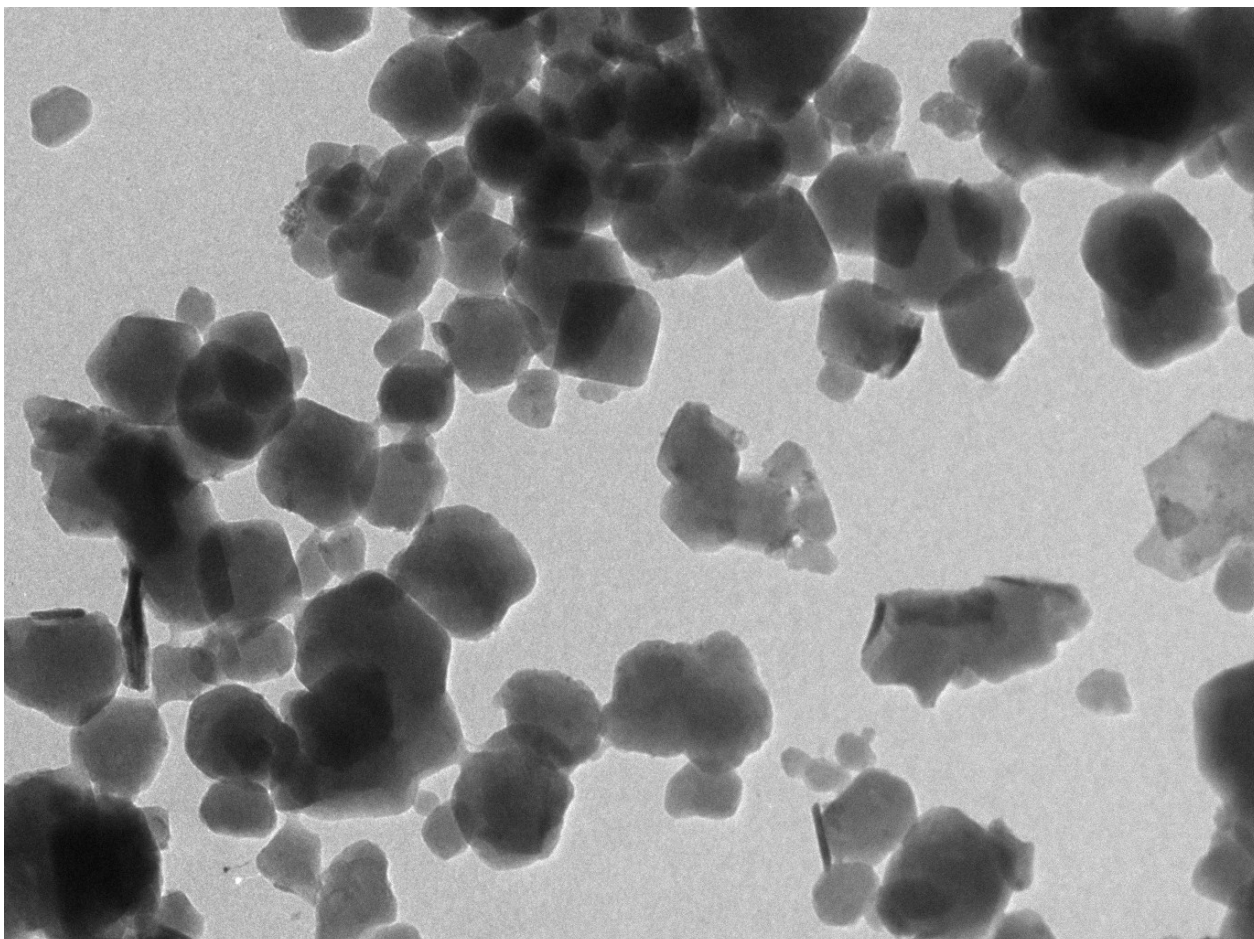

ZIF - 67.008

Print Mag: 39800x @ 51 mm

10:48:34 a 03/09/13

TEM Mode: Imaging

100 nm

HV=80.0kV

Direct Mag: 20000x

Fig. S3. TEM micrograph of the ZIF-67.

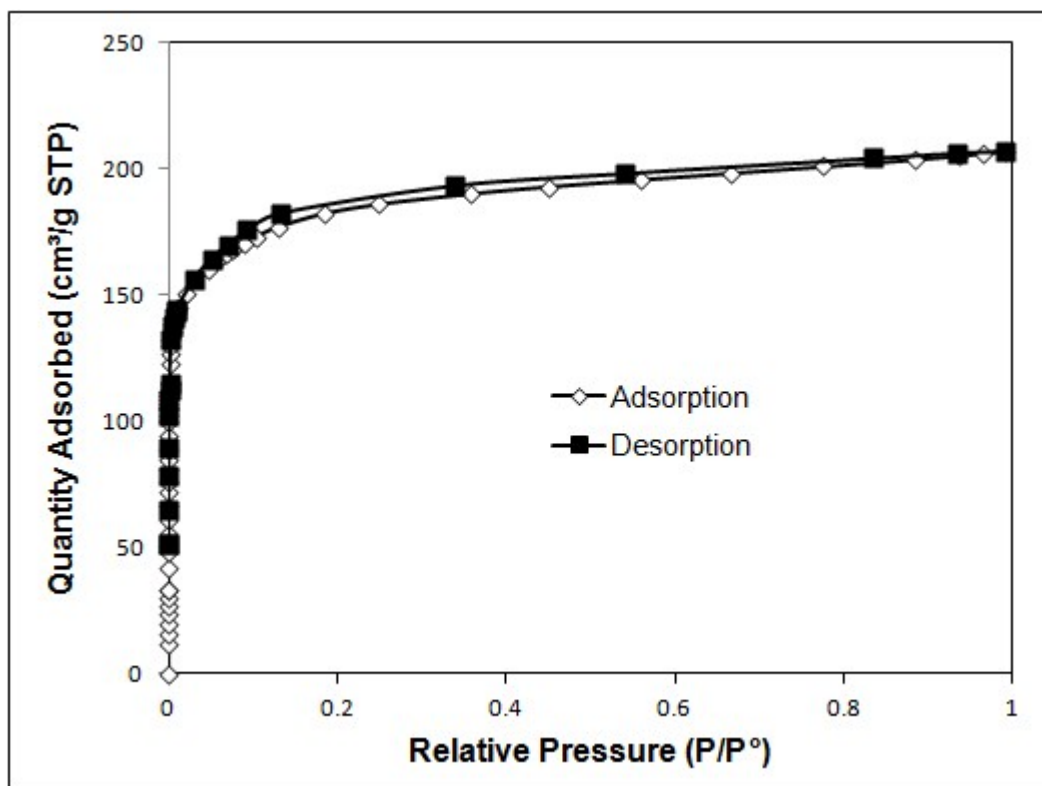

Fig. S4. Nitrogen adsorption/desorption isotherm of the ZIF-67.

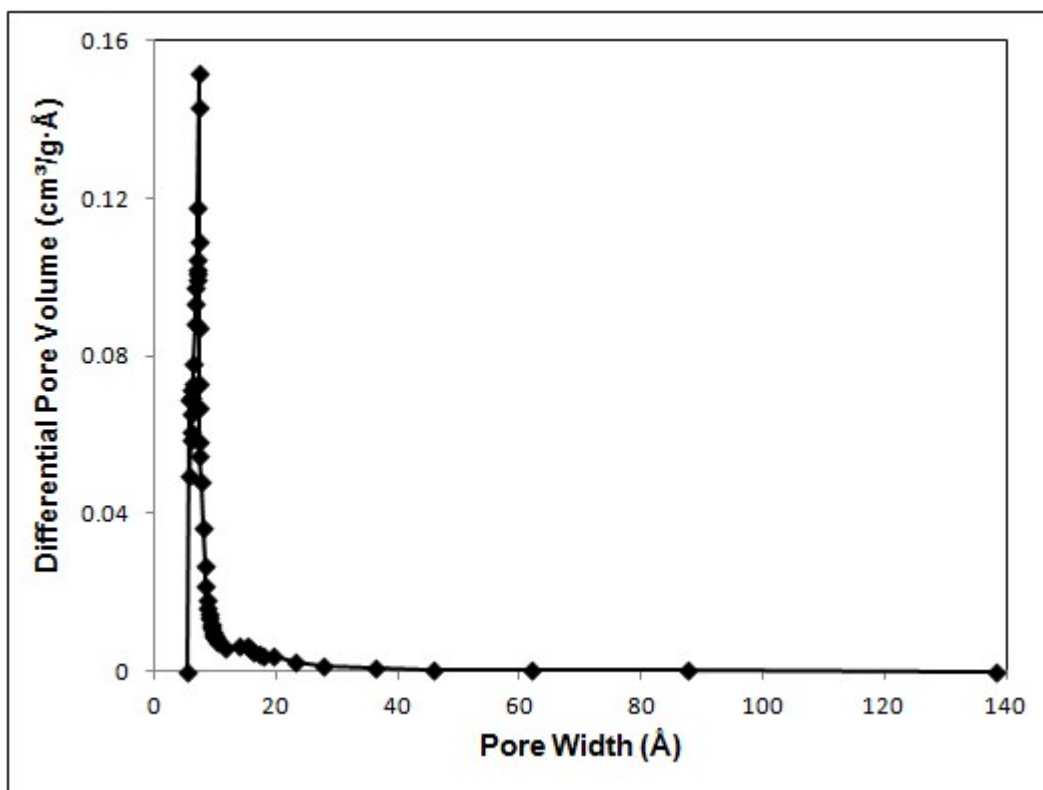

Fig. S5. Pore size distribution of the ZIF-67.

Pore size distribution measurement parameters:

Sample Mass: 0.2843 g

Thermal Correction: No

Cold Free Space: 47.9826 cm<sup>3</sup>

Warm Free Space: 16.2399 cm<sup>3</sup>

Ambient temperature: 22.00 °C

Measured

Automatic Degas: Yes

Equilibration Interval: 5 s

Analysis Adsorptive: N<sub>2</sub>

Low Pressure Dose: None

Analysis Bath Temp.: 77.300 K

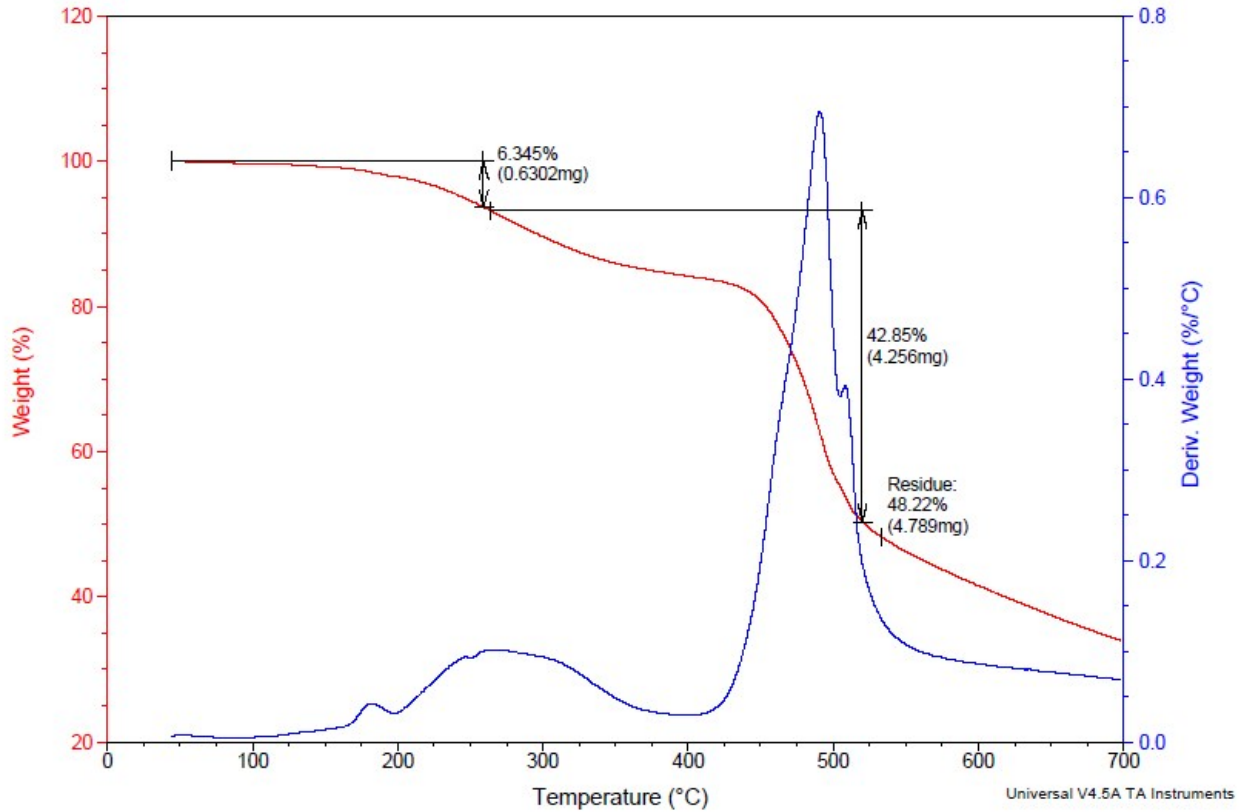

Fig. S6. TGA analysis of the ZIF-67.



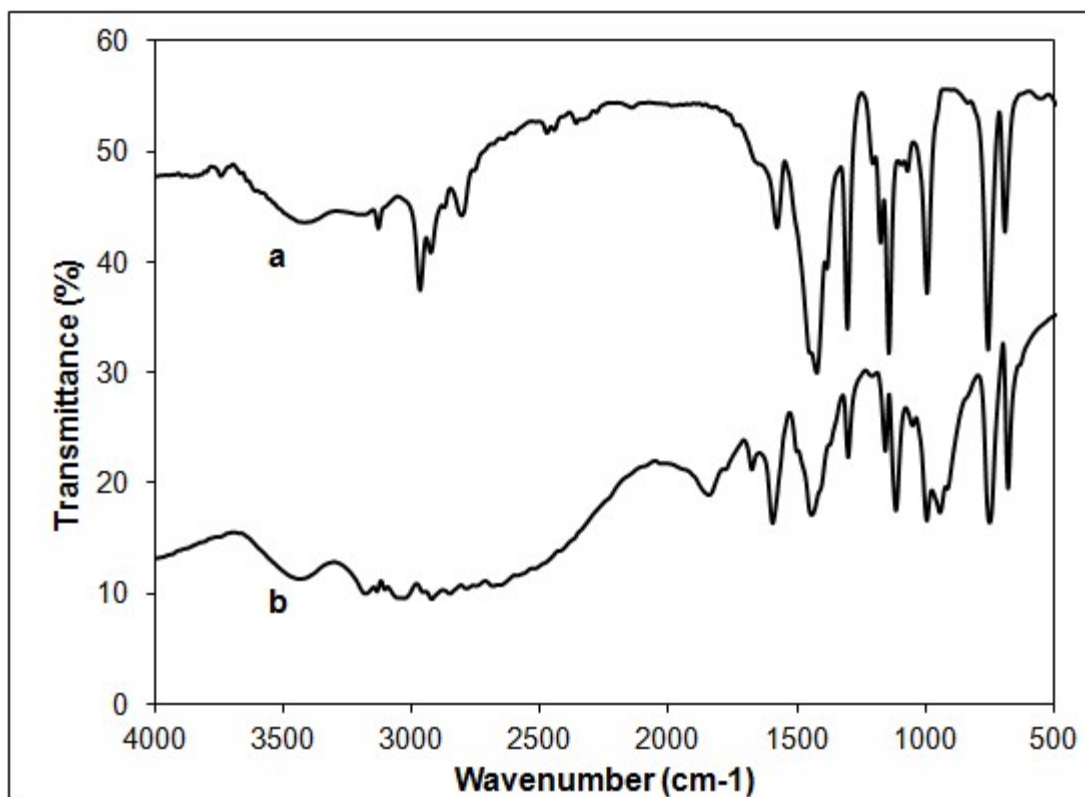

Fig. S7. FT-IR spectrum of the ZIF-67 (a) and 2-methylimidazole (b).

### ZIF-9:

The ZIF-9 was prepared according to literature procedure [2]. In a typical preparation, a solid mixture of cobalt nitrate hexahydrate (2.10 g, 7.21 mmol) and benzimidazole (0.60 g, 5.08 mmol) was dissolved in 180 mL of *N,N'*-dimethylformamide (DMF), and then distributed in 20 mL vials. The vials were tightly capped and heated at a rate of 5 °C min<sup>-1</sup> to 140 °C in a programmable oven and held at this temperature for 48 h, then cooled at a rate of 0.4 °C min<sup>-1</sup> to room temperature. The purple crystals were collected from the mother liquor, washed with DMF (3 x 15 mL) for 3 days. After that, the DMF was exchanged by

dichloromethane (3 x 15 mL) for 3 days. The residual solvents were removed under vacuum at 200 °C for 6 h, yielding 0.25 g of purple crystals (25% based on benzimidazole).

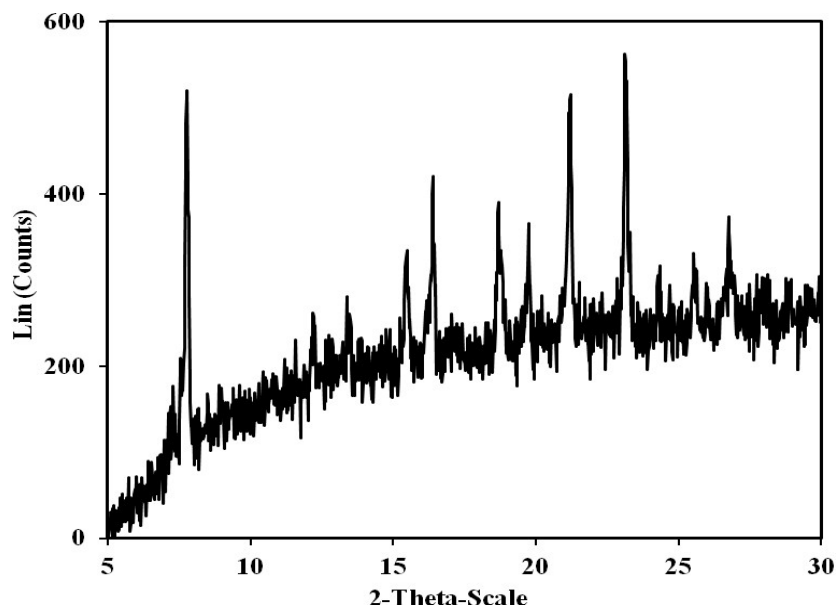

Fig. S8. X-ray powder diffractogram of the ZIF-9.

#### **Co<sub>2</sub>(BDC)<sub>2</sub>(DABCO):**

The Co<sub>2</sub>(BDC)<sub>2</sub>(DABCO) was prepared according to the modified literature procedure [3]. H<sub>2</sub>BDC (H<sub>2</sub>BDC = 1,4-benzenedicarboxylic acid; 0.332 g, 2 mmol), DABCO (DABCO = 1,4-diazabicyclo[2.2.2]octane; 0.112 g, 1 mmol), and Co(NO<sub>3</sub>)<sub>2</sub>·6H<sub>2</sub>O (0.58 g, 2 mmol) was dissolved in DMF (DMF = *N,N*'-dimethylformamide; 15 ml). The resulting solution was distributed to two 20 ml vials. The vials were then heated at 100 °C in an isothermal oven for 48 h. After cooling the vials to room temperature, the solid product was removed by decanting with mother liquor and washed in DMF (3 x 10 mL) for 3 days. Solvent exchange was carried out with methanol (3 x 10 mL) at room temperature for 3 days. The material was

then evacuated under vacuum at 140 °C for 6 h, yielding 0.407 g of  $\text{Co}_2(\text{BDC})_2(\text{DABCO})$  in the form of purple crystals (73% yield based on cobalt salt).

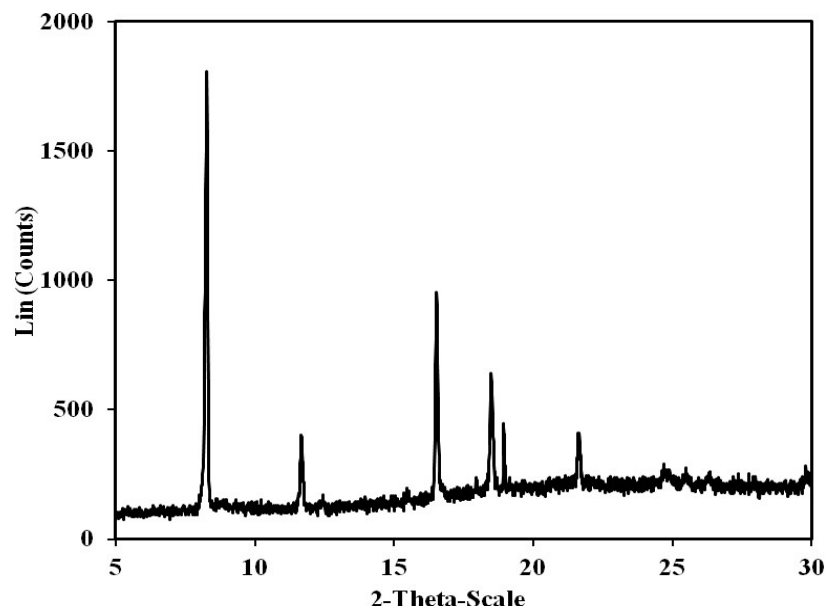

Fig. S9. X-ray powder diffractogram of the  $\text{Co}_2(\text{BDC})_2(\text{DABCO})$ .

#### **Co-MOF-74:**

The Co-MOF-74 was prepared according to literature procedure [4]. In a typical preparation, a mixture of 2,5- dihydroxyterephthalic acid (DHTA) (0.05 g, 0.25 mmol), and  $\text{Co}(\text{NO}_3)_2 \cdot 6\text{H}_2\text{O}$  (0.150 g, 0.52 mmol) was dissolved in a mixture of DMF (10 mL), ethanol (10 mL) and water (10 mL) and the resulting solution was distributed to two 20 mL vials. The vial was then heated at 100 °C in an isothermal oven for 48 h. After cooling the vial to room temperature, the solid product was removed by decanting with mother liquor and washed in DMF (3 x 10 mL) for 3 days. Solvent exchange was then carried out with methanol (3 x 10 mL) at room temperature for 3 day. The material was then evacuated under vacuum at 200 °C

for 6 h, yielding 0.051g of Co-MOF-74 in the form of deep purple crystals (80% based on 2,5- dihydroxyterephthalic acid).

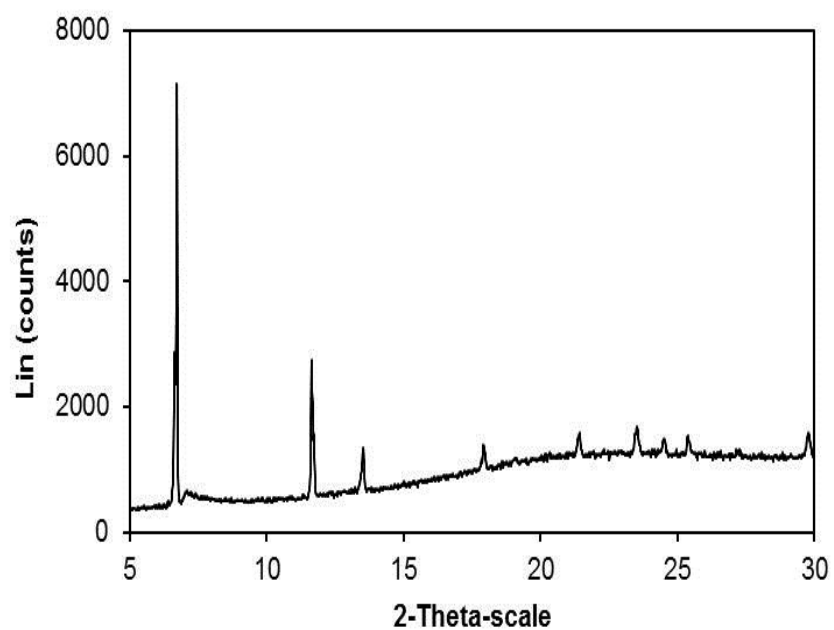

Fig. S10. X-ray powder diffractogram of the Co-MOF-74.

### 3 Product isolation and characterization

Conversion was calculated as equation:

$$Y(t) = \frac{\frac{S_{(SM)}}{S_{(diphenyl\ ether)}}(t_0) - \frac{S_{(SM)}}{S_{(diphenyl\ ether)}}(t)}{\frac{S_{(SM)}}{S_{(diphenyl\ ether)}}(t_0)} \times 100\%$$

In which:

$S_{SM}$ : peak area of starting material.

$S_{diphenyl\ ether}$ : peak area of standard diphenyl ether.

*Isolation of products:* In a typical experiment, a mixture of 2-aminobenzoketone (1 mmol), benzylamines (1.5 mmol), *tert*-butyl hydroperoxide 70% in water (685  $\mu$ l, 5 mmol), and toluene (5 ml) was added into a 25 mL flask containing ZIF-67 catalyst (0.0066g, 0.03 mmol). The reaction mixture was stirred at 80 °C for 180 min. After the completion of reaction, catalyst was filtered off. The solution was washed with NaCl (saturated aqueous solution, 3 x 15 mL) and extracted with ethyl acetate (3 x 20 mL). The combined organic phase was then dried over  $Na_2SO_4$  and concentrated under vacuum. After chromatography (ethylacetate/hexane = 1:15), pure products were obtained.

TAM008-CDC13-1H

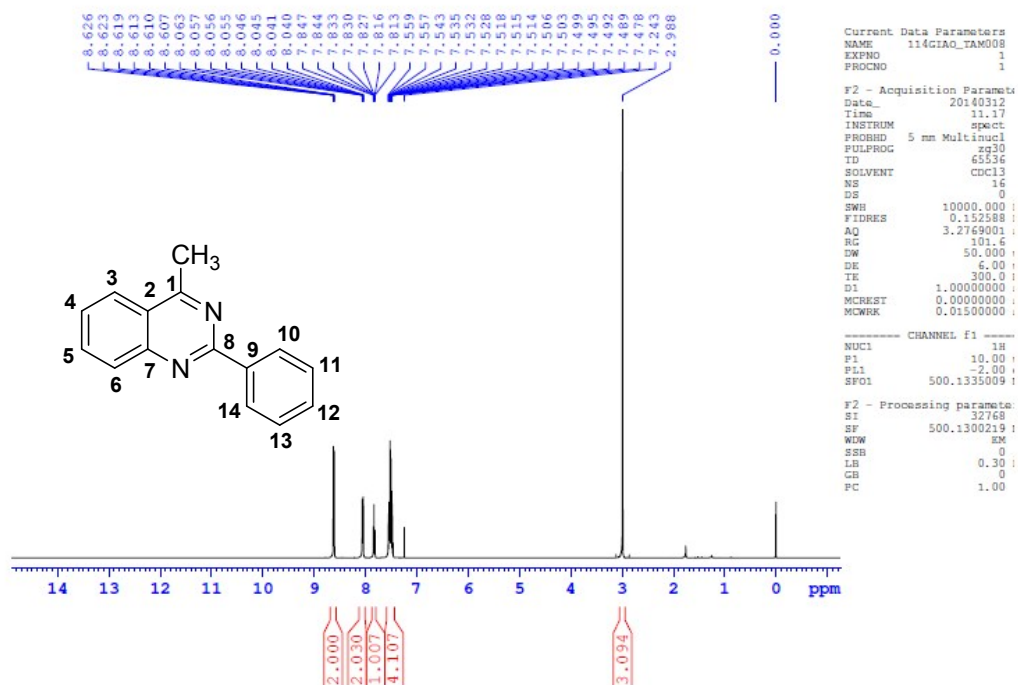

TAM008-CDC13-C13CPD

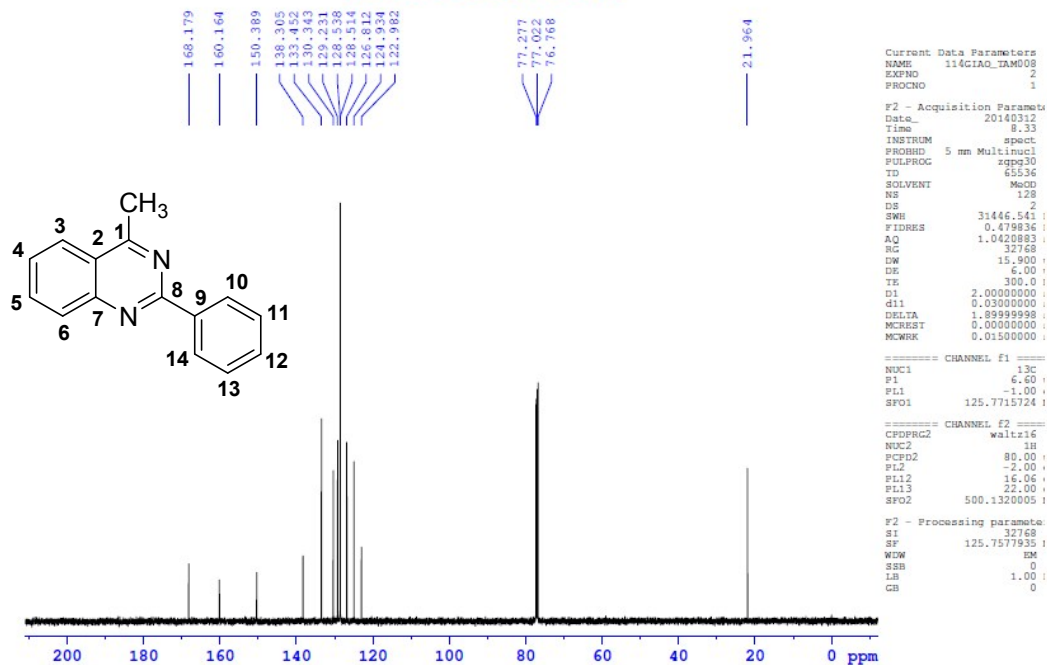

Fig. S11. <sup>1</sup>H NMR spectra and <sup>13</sup>C NMR of 4-methyl-2-phenylquinazoline in CDCl<sub>3</sub>.

**4-methyl-2-phenylquinazoline:** a white solid (191 mg, yield: 87%). This compound is known [5].  $^1\text{H}$  NMR (500 MHz,  $\text{CDCl}_3$ , TMS):  $\delta$  (ppm) = 2.99 (s, 3H,  $\text{CH}_3$ ), 7.48-7.56 (m, 4H,  $H_{\text{C}_4, \text{C}_{11}, \text{C}_{12}, \text{C}_{13}}$ ), 7.81-7.85 (m, 1H,  $H_{\text{C}_6}$ ), 8.04-8.06 (m, 2H,  $H_{\text{C}_3, \text{C}_5}$ ), 8.61-8.63 (m, 2H,  $H_{\text{C}_{10}, \text{C}_{14}}$ ).  $^{13}\text{C}$  NMR (125MHz,  $\text{CDCl}_3$ , TMS):  $\delta$  (ppm) = 22.0, 123.0, 124.9, 126.8, 128.5, 128.5, 129.2, 130.3, 133.4, 138.3, 150.4, 160.2, 168.2.

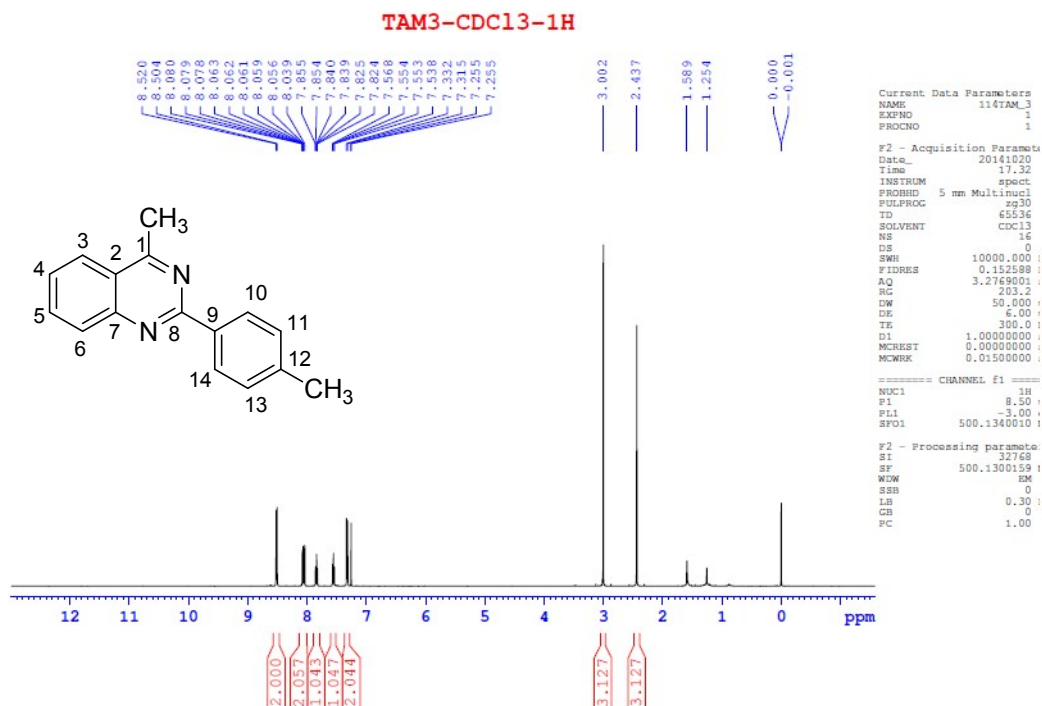

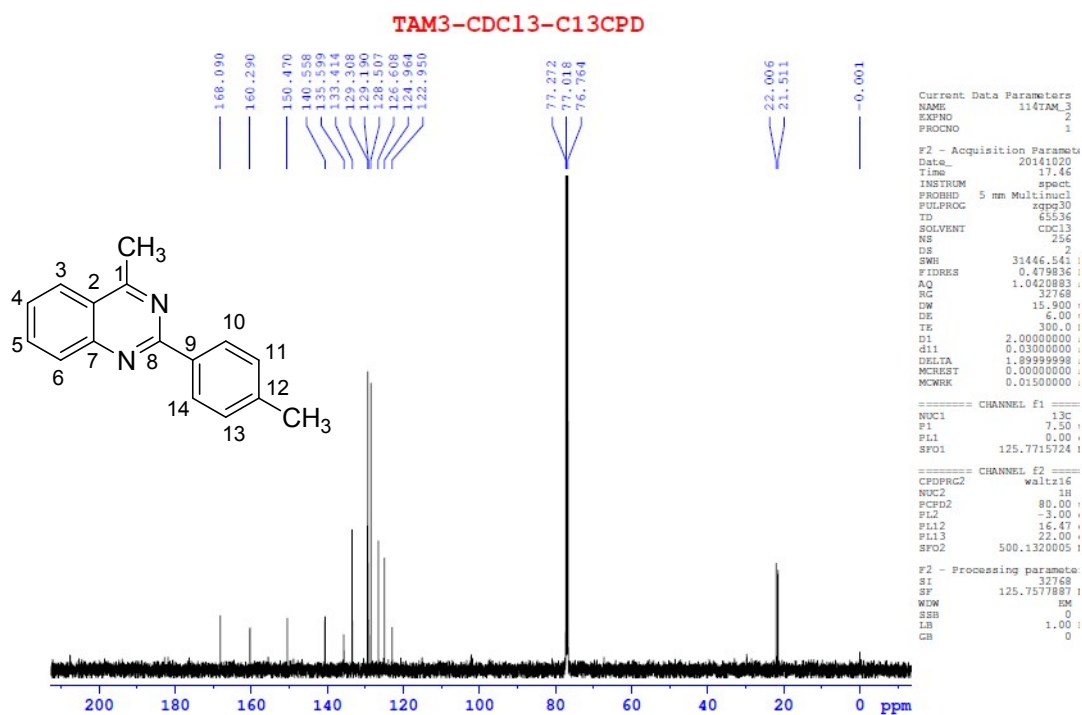

Fig. S12.  $^1\text{H}$  NMR spectra and  $^{13}\text{C}$  NMR of 4-methyl-2-(p-tolyl)quinazoline in  $\text{CDCl}_3$ .

**4-methyl-2-(p-tolyl)quinazoline:** a pale yellow solid (176 mg, yield: 75%). This compound is known [6].  $^1\text{H}$  NMR (500 MHz,  $\text{CDCl}_3$ , TMS):  $\delta$  (ppm) = 2.44 (s, 3H,  $\text{C}_{12}\text{CH}_3$ ), 3.00 (s, 3H,  $\text{C}_1\text{CH}_3$ ), 7.32 (d,  $J = 8.3$  Hz, 2H,  $H_{\text{C}_{11},\text{C}_{13}}$ ), 7.55 (t,  $J = 7.3$  Hz, 1H,  $H_{\text{C}_4}$ ), 7.84 (dt,  $J = 0.5$  Hz,  $J = 7.5$  Hz, 1H,  $H_{\text{C}_6}$ ), 8.04-8.08 (m, 2H,  $H_{\text{C}_3,\text{C}_5}$ ), 8.51 (d,  $J = 8.3$  Hz, 2H,  $H_{\text{C}_{10},\text{C}_{14}}$ ).  $^{13}\text{C}$  NMR (125MHz,  $\text{CDCl}_3$ , TMS):  $\delta$  (ppm) = 21.5, 22.0, 123.0, 125.0, 126.6, 128.5, 129.2, 129.3, 133.4, 135.6, 140.6, 150.5, 160.3, 168.1.



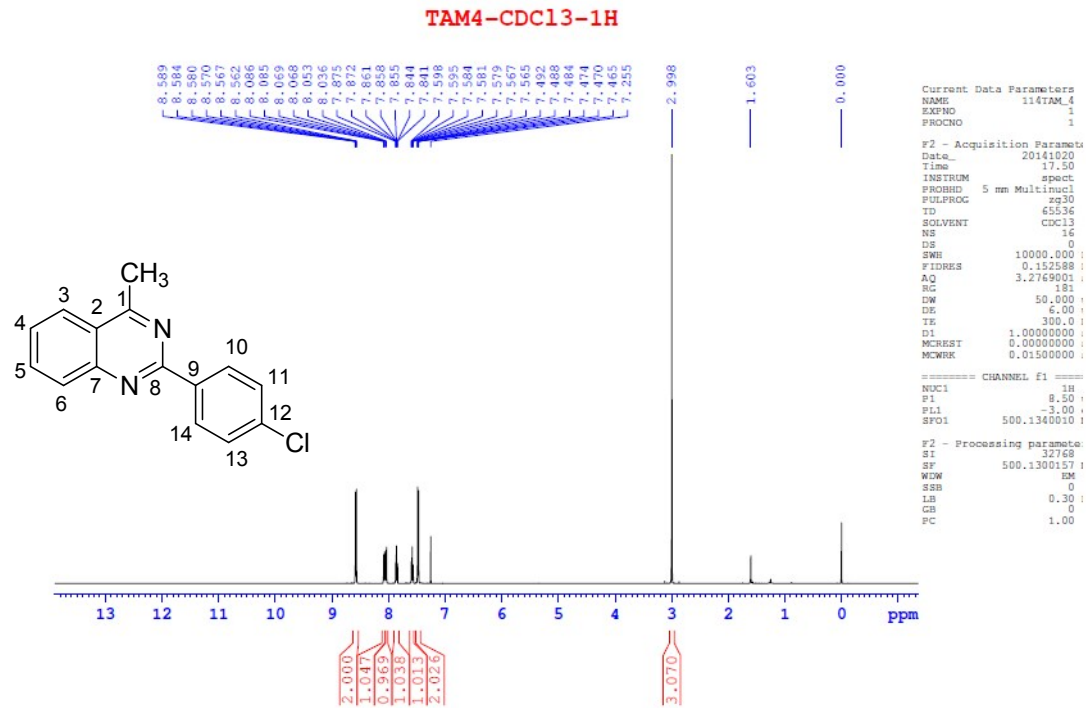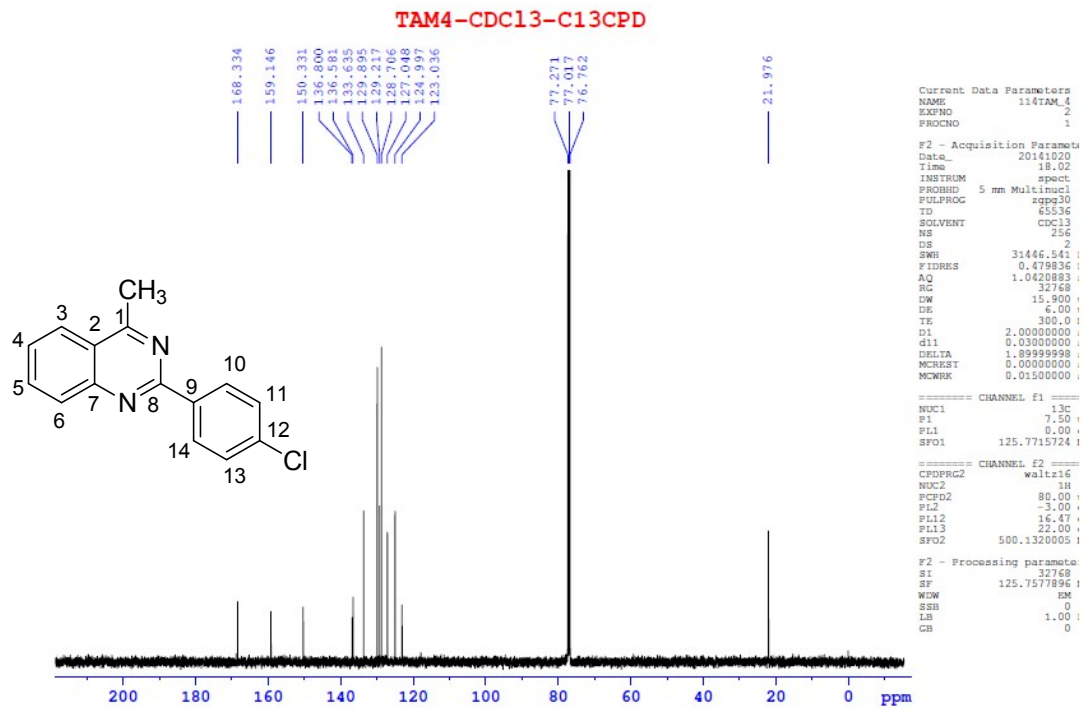

Fig. S13. <sup>1</sup>H NMR spectra and <sup>13</sup>C NMR of 2-(4-chlorophenyl)-4-methylquinazoline in CDCl<sub>3</sub>.

**2-(4-chlorophenyl)-4-methylquinazoline:** a pale yellow solid (210 mg, yield: 83%). This compound is known [6].  $^1\text{H}$  NMR (500 MHz,  $\text{CDCl}_3$ , TMS):  $\delta$  (ppm) = 3.00 (s, 3H,  $\text{CH}_3$ ), 7.47-7.49 (m, 2H,  $H_{\text{C11,C13}}$ ), 7.57-7.60 (m, 1H,  $H_{\text{C4}}$ ), 7.84-7.88 (m, 1H,  $H_{\text{C6}}$ ), 8.05 (d,  $J = 8.5$  Hz, 1H,  $H_{\text{C3}}$ ), 8.08 (dd,  $J = 0.5$  Hz,  $J = 8.5$  Hz,  $H_{\text{C5}}$ ), 8.56-8.59 (m, 2H,  $H_{\text{C10,C14}}$ ).  $^{13}\text{C}$  NMR (125MHz,  $\text{CDCl}_3$ , TMS):  $\delta$  (ppm) = 22.0, 123.0, 125.0, 127.0, 128.7, 129.2, 129.9, 133.6, 139.6, 136.8, 150.3, 159.1, 168.3.

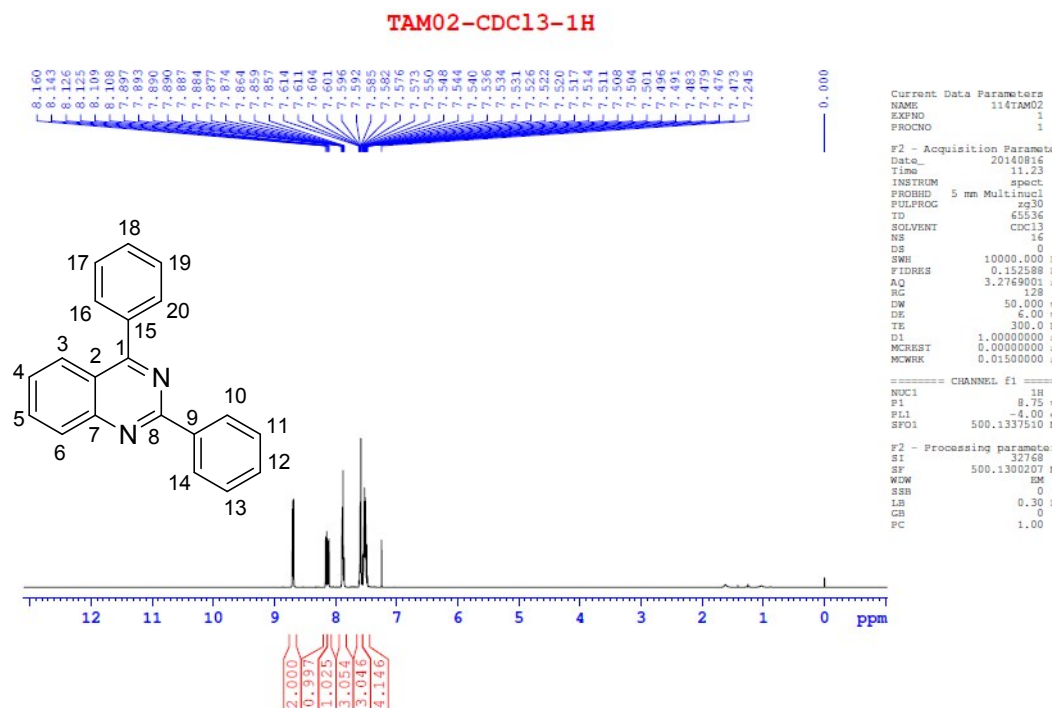

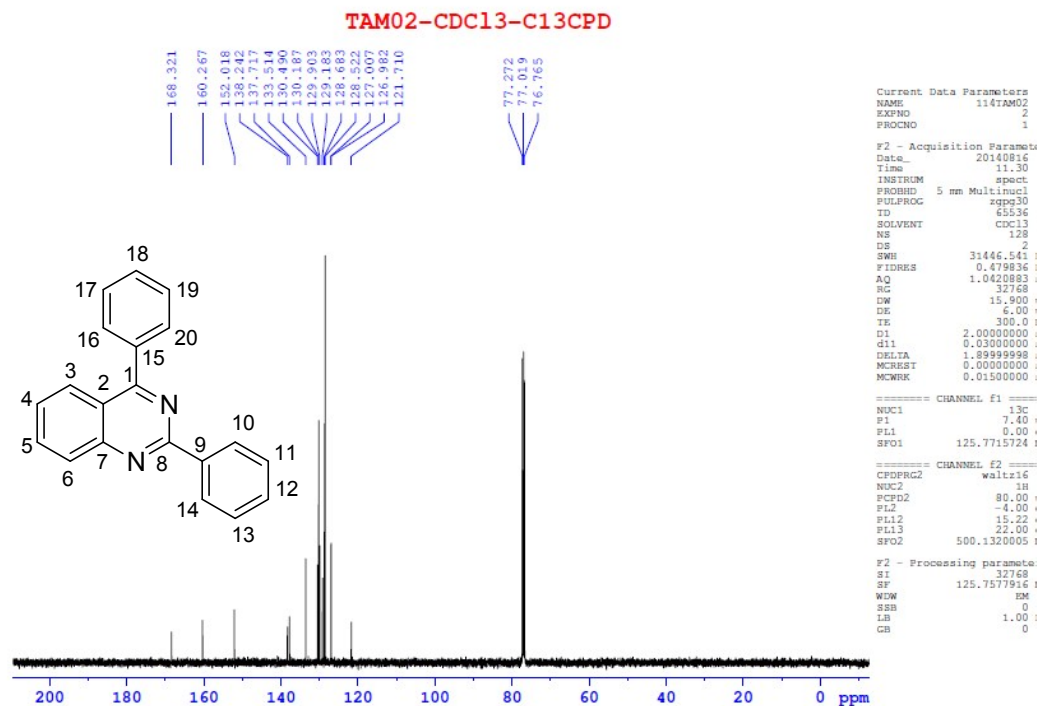

Fig. S14.  $^1\text{H}$  NMR spectra and  $^{13}\text{C}$  NMR of 2,4-diphenylquinazoline in  $\text{CDCl}_3$ .

**2,4-diphenylquinazoline:** a white solid (250 mg, yield: 89%). This compound is known [5].  $^1\text{H}$  NMR (500 MHz,  $\text{CDCl}_3$ , TMS):  $\delta$  (ppm) = 7.47-7.55 (m, 4H,  $H_{\text{C11,C13,C17,C19}}$ ), 7.57-7.61 (m, 3H,  $H_{\text{C4,C12,C18}}$ ), 7.86-7.90 (m, 3H,  $H_{\text{C6,C16,C20}}$ ), 8.11 (dd,  $J = 0.5$  Hz,  $J = 8.5$  Hz, 2H,  $H_{\text{C3}}$ ), 8.15 (d,  $J = 8.5$  Hz,  $H_{\text{C5}}$ ), 8.68-8.71 (m, 2H,  $H_{\text{C10,C14}}$ ).  $^{13}\text{C}$  NMR (125MHz,  $\text{CDCl}_3$ , TMS):  $\delta$  (ppm) = 121.7, 127.0, 127.0, 128.5, 128.7, 129.2, 129.9, 130.2, 130.5, 133.5, 137.7, 138.2, 152.0, 160.3, 168.3.

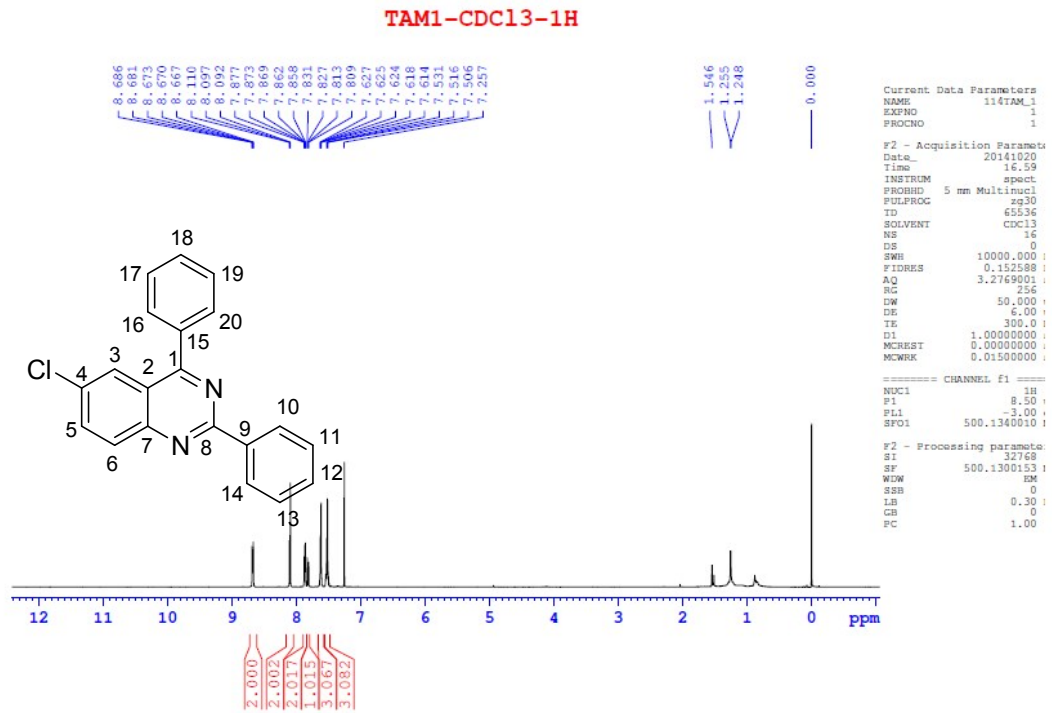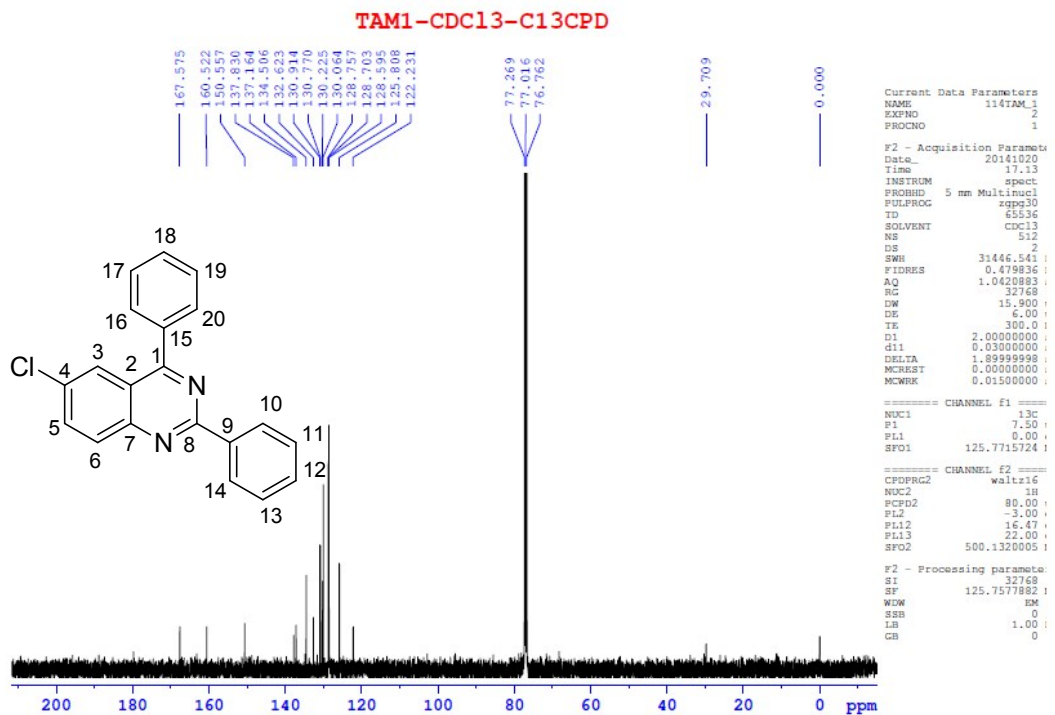

Fig. S15.  $^1\text{H}$  NMR spectra and  $^{13}\text{C}$  NMR of 6-chloro-2,4-diphenylquinazoline in  $\text{CDCl}_3$ .

**6-chloro-2,4-diphenylquinazoline:** a pale yellow solid (246 mg, yield: 78%). This compound is known [5]. <sup>1</sup>H NMR (500 MHz, CDCl<sub>3</sub>, TMS): δ (ppm) = 7.51-7.53 (m, 3H, *H*<sub>C17,C18,C19</sub>), 7.61-7.63 (m, 3H, *H*<sub>C11,C12,C13</sub>), 7.81-7.88 (dd, *J* = 2.0 Hz, *J* = 9.0 Hz, 1H, *H*<sub>C5</sub>), 7.86-7.88 (m, 2H, *H*<sub>C16,C20</sub>), 8.09-8.11 (m, 2H, *H*<sub>C3,C6</sub>), 8.67-8.69 (m, 2H, *H*<sub>C10,C14</sub>). <sup>13</sup>C NMR (125 MHz, CDCl<sub>3</sub>, TMS): δ (ppm) = 122.2, 125.8, 128.6, 128.7, 128.8, 130.1, 130.2, 130.8, 130.9, 132.6, 134.5, 137.2, 137.8, 150.6, 160.5, 167.6.

## References

1. A.F. Gross, E. Sherman, J.J. Vajo, Dalton Trans. 41 (2012) 5458.
2. K. S. Park, Z. Ni, A. P. Côté , J. Y. Choi, R. D. Huang, F. J. Uribe-Romo, H. K. Chae, M. O’Keeffe and O. M. Yaghi, Proc. Natl. Acad. Sci. U. S. A., 2006, 103, 10186.
3. Kui Tan; Nour Nijem; Pieremanuele Canepa; Qihan Gong; Jing Li; Timo Thonhauser; Yves J Chaba, Chemistry of Materials 2012, 24, 3153.
4. T.G. Glover, G. W. Peterson, B. J. Schindler, D. Britt, O. M. Yaghi, Chemical Engineering Science 66 (2011) 163.
5. N. Anand, K.H.P. Reddy, T. Satyanarayana, K.S.R. Rao, D.R. Burri, Catal. Sci. Technol., 2 (2012) 570.
6. Huamin Wang, Hui Chen, Ya Chen and Guo-Jun Deng, Org. Biomol. Chem. DOI: 10.1039/c4ob01296h.
